# Supplementary material
Source: PubMed Central journal article supplement (PMC2939279)
Supplement: NIHMS221884-supplement-01.pdf [file NIHMS221884-supplement-01.pdf]

## Legends for Supplemental Figures

**Suppl. Fig. 1.** MMP and TIMP mRNA expression in mouse prostate epithelial cells with different PTEN status. Total RNA was isolated from *PTEN*<sup>+/+</sup>, *PTEN*<sup>+/-</sup>, and *PTEN*<sup>-/-</sup> cells cultured in complete media. MMP and TIMP levels were assessed by semi-quantitative PCR analysis using specific mouse primers as indicated in Supplemental table 1.

**Suppl. Fig. 2.** Effect of pharmacological inhibitors on MT-MMPs and MMP-9 mRNA levels in *PTEN*<sup>+/+</sup> and *PTEN*<sup>-/-</sup>. Serum starved *PTEN*<sup>+/+</sup> and *PTEN*<sup>-/-</sup> cells were incubated with various doses of either LY294,002 (*A upper panels*), PD98,059 (*A lower panels*), or Rapamycin (*B*) for 18 hours (*A*) or 48 hours (*B*) in serum-free media. Total RNA was isolated, and expression of MT-MMPs and GAPDH mRNAs were analyzed by semi-quantitative PCR using mouse specific primers as described in Supplemental Table 1.
