# Supplementary material
Source: PubMed Central journal article supplement (PMC2939279)
Supplement: NIHMS221884-supplement-04.pdf [file NIHMS221884-supplement-04.pdf]

# Suppl. Table 1

| Species | Primer Name | Tm (°C) | Sequence (5' to 3')        | Product size (bp) |
|---------|-------------|---------|----------------------------|-------------------|
| Mouse   | MT1-MMP-SP  | 56.3    | CCG CCA TGC AAA AGT TCT AT | 212               |
|         | MT1-MMP-ASP | 56.8    | GCC CAC CTT AGG GGT GTA AT |                   |
|         | MT2-MMP-SP  | 57.1    | CCC ACA GGT CAC ACC TTC TT | 186               |
|         | MT2-MMP-ASP | 57.4    | CCA GTA CTT GGT GCC CTT GT |                   |
|         | MT3-MMP-SP  | 53.8    | CGT TCG GGT GTG TTT TTC TT | 250               |
|         | MT3-MMP-ASP | 55.3    | GAG GCT TCT TCA TCC AGT CG |                   |
|         | MT4-MMP-SP  | 57.5    | GAC CTG TCT CCG ACT TCA GC | 217               |
|         | MT4-MMP-ASP | 55.6    | TAG GAT GCA CCA TCA GAC CA |                   |
|         | MT5-MMP-SP  | 54.9    | TGC AGA TCG AAC AGT TCT GG | 239               |
|         | MT5-MMP-ASP | 54.5    | TCG TTC GCC TTT GAA GAA GT |                   |
|         | MT6-MMP-SP  | 57.6    | GCT GAC TCG CTA TGG CTA CC | 244               |
|         | MT6-MMP-ASP | 55.4    | CTT CCA AAC ACT GCC ACT CA |                   |
|         | MMP1a-SP    | 53.7    | CTC CTT GCC ATT CAC GTT TT | 157               |
|         | MMP1a-ASP   | 54.5    | CCT TCC TTT GCT GTT GCT TC |                   |
|         | MMP1b-SP    | 57.5    | ATG GGA GAG TCC AAG GGA GT | 207               |
|         | MMP1b-ASP   | 57.3    | GTG CTC TCC TTC CAC AGA GG |                   |
|         | MMP2-SP     | 55.8    | AC ACC AGG TGA AGG ATG TG  | 203               |
|         | MMP2-ASP    | 53.7    | AGG GCT GCA TTG CAA ATA TC |                   |
|         | MMP9-SP     | 53.7    | TGA ATC AGC TGG CTT TTG TG | 242               |
|         | MMP9-ASP    | 57.1    | GTG GAT AGC TCG GTG GTG TT |                   |
|         | TIMP1-SP    | 57.3    | CTC AGA GTA CGC CAG GGA AC | 183               |
|         | TIMP1-ASP   | 53.3    | ATT CAA GGC TGT GGG AAA TG |                   |
|         | TIMP2-SP    | 54.4    | GGG TCC TCG ATG TCA AGA AA | 250               |
|         | TIMP2-ASP   | 55.9    | GCA TCA CCC AGA AGA AGA GC |                   |
|         | TIMP3-SP    | 55.6    | CCG AGG CTT CAG TAA GAT GC | 160               |
|         | TIMP3-ASP   | 55.4    | CCT CTC CAC AAA GTT GCA CA |                   |
|         | TIMP4-SP    | 52.4    | TGA TAC GGG CCA AAA TAT CC | 365               |
|         | TIMP4-ASP   | 55.9    | ACA TGG CAC TGC ATA GCA AG |                   |
|         | PTEN-SP     | 54.3    | ACA CCG CCA AAT TTA ACT GC | 630               |
|         | PTEN-ASP    | 56.3    | TGA GGT TTC CTC TGG TCC TG |                   |
|         | GAPDH-SP    | 59.9    | AAC TTT GGC ATT GTG GAA GG | 223               |
|         | GAPDH-ASP   | 60.1    | ACA CAT TGG GGG TAG GAA CA |                   |

**Supplemental Table 1. List of PCR primers for mouse and human genes.**  
 SP, Sense Primer; ASP, Antisense Primer.
