# Supplementary material
Source: PubMed Central journal article supplement (PMC2939279)

# Suppl. Figure 1

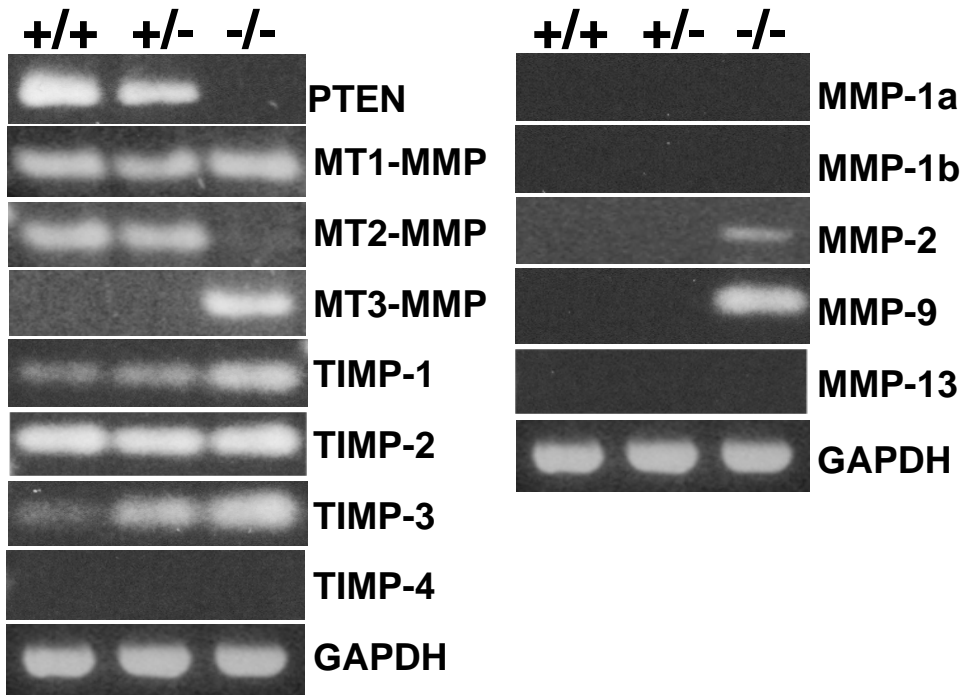

Supplement: NIHMS221884-supplement-02.pdf [file NIHMS221884-supplement-02.pdf]

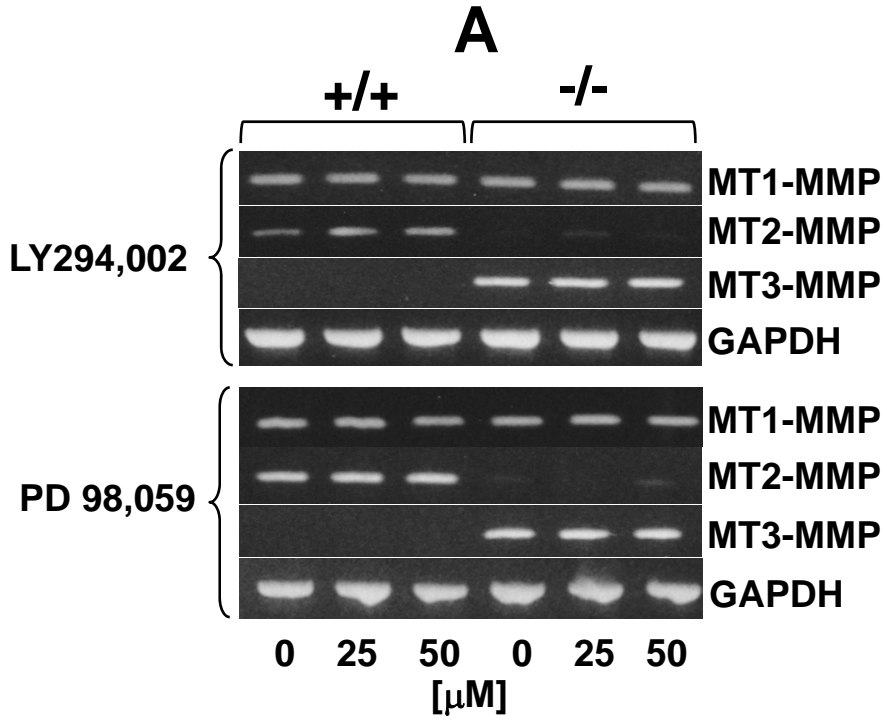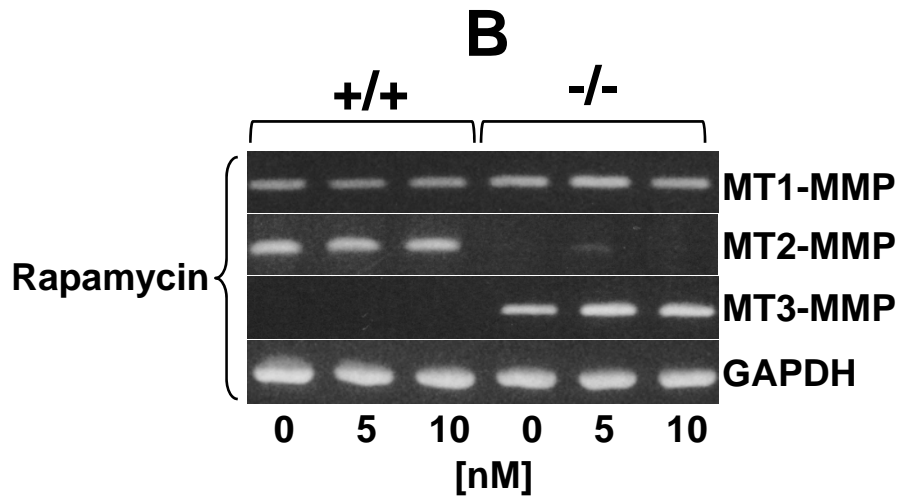

Supplement: NIHMS221884-supplement-03.pdf [file NIHMS221884-supplement-03.pdf]
